# Supplementary material for: Effect of counterions on the structure and dynamics of water near a negatively charged surfactant: a theoretical vibrational sum frequency generation study
Source: Royal Society of Chemistry journal article supplement (doi:10.1039/d4cp00537f), 2024-01-01
Supplement: d4cp00537f1.pdf [file d4cp00537f1.pdf]

## Supplementary Information

### Effect of Counterions on the Structure and Dynamics of Water near a Negatively Charged Surfactant: A Theoretical Vibrational Sum Frequency Generation Study

Ravi Malik<sup>1,2</sup>, Shinji Saito<sup>2,1,\*</sup> and Amalendu Chandra<sup>1,2,\*</sup>

<sup>1</sup>Department of Chemistry, Indian Institute of Technology Kanpur, Uttar Pradesh, India  
208016.

<sup>2</sup> Department of Theoretical and Computational Molecular Science, Institute of  
Molecular Science, Myodaiji, Okazaki 444-8585, Aichi, Japan

---

\*For correspondence: amalen@iitk.ac.in (Amalendu Chandra), shinji@ims.ac.jp (Shinji Saito)

**Table S1:** Surface area per sodium dodecyl sulfate molecule (SDS) for each system. The experimental value of the surface area has been reported as  $47.4 \text{ \AA}^2$ .<sup>1</sup>

| System            | Calculated Surface Area ( $\text{\AA}^2$ ) |
|-------------------|--------------------------------------------|
| No salt           | 44.83                                      |
| MgCl <sub>2</sub> | 46.01                                      |
| LiCl              | 45.98                                      |
| CsCl              | 46.86                                      |

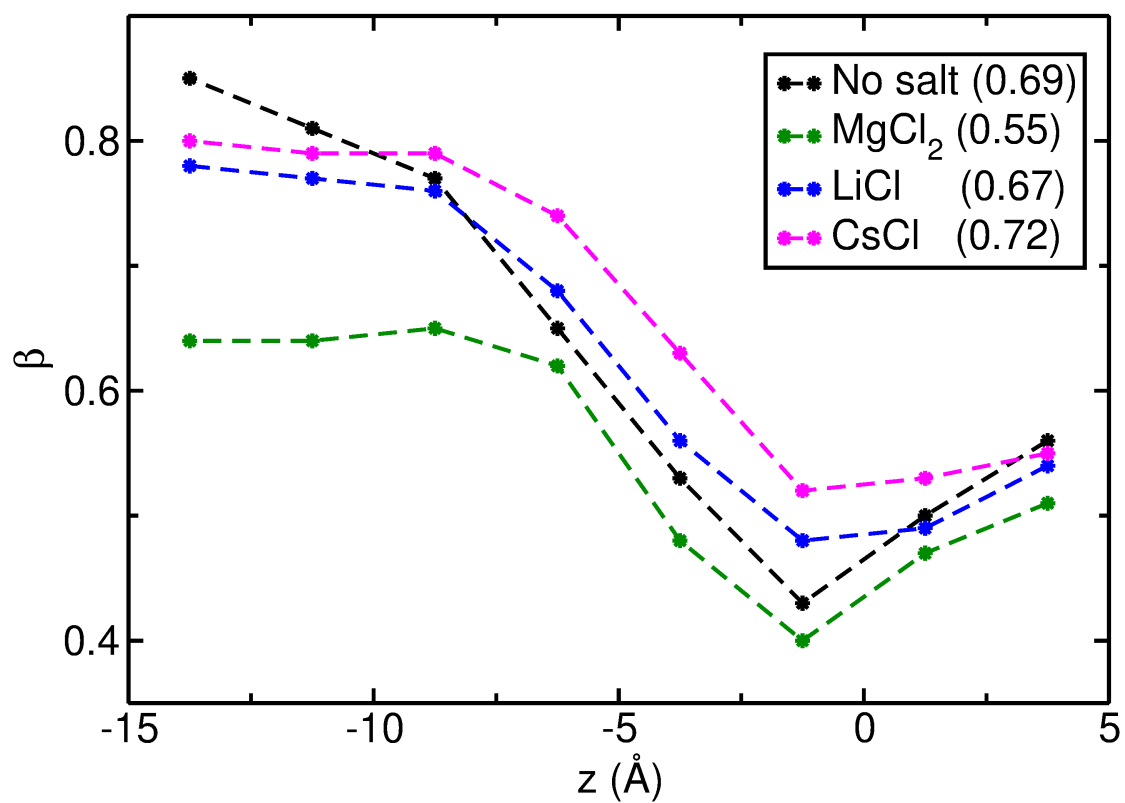

**Figure S1:** Heterogeneity parameter ( $\beta$ ) for water molecules in each layer of width 2.5 Å. The numbers in the x-axis represent the distance from the reference Gibbs dividing surface (labeled as 0 in the x-axis). The values of  $\beta$  when the correlation functions are averaged over all water molecules for a given system are also shown in the legend for reference.

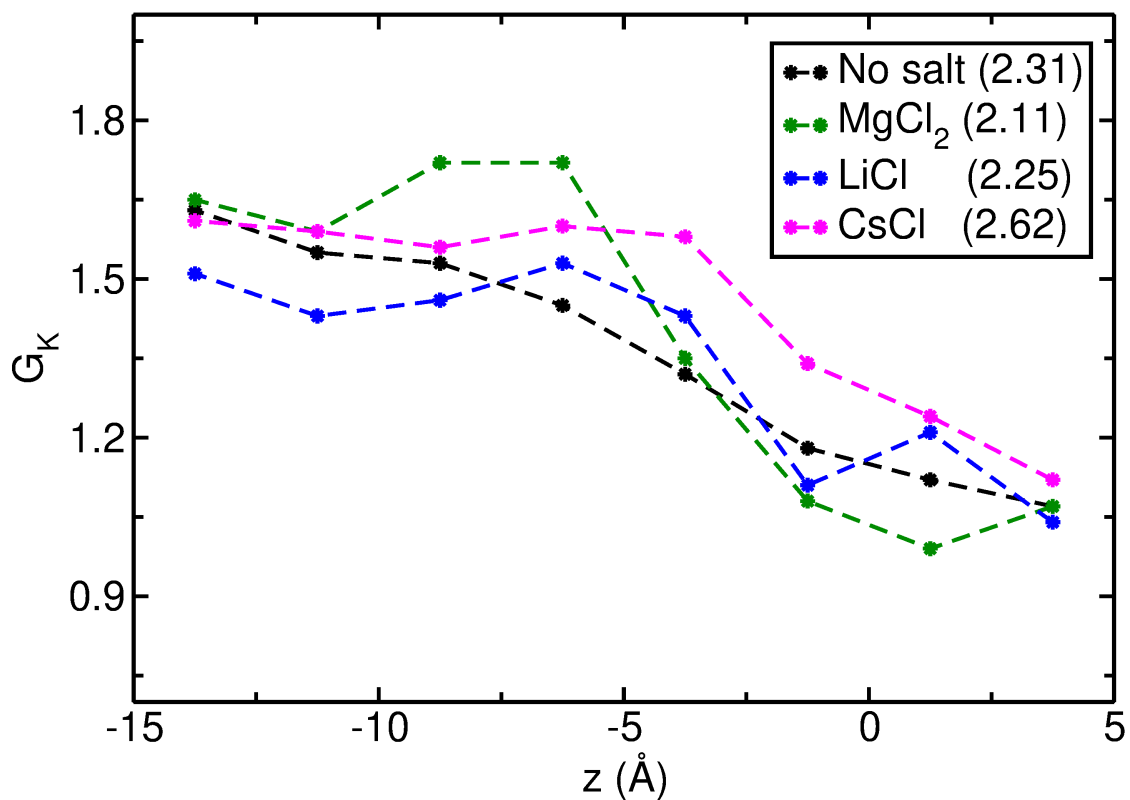

**Figure S2:** Kirkwood g-factor ( $G_K$ ) for water molecules in each layer of width 2.5 Å. The numbers in the x-axis represent the distance from the reference Gibbs dividing surface (labeled as 0 on the x-axis). The values of  $G_K$  when obtained through averaging over all water molecules for a given system are also shown in the legend for reference.

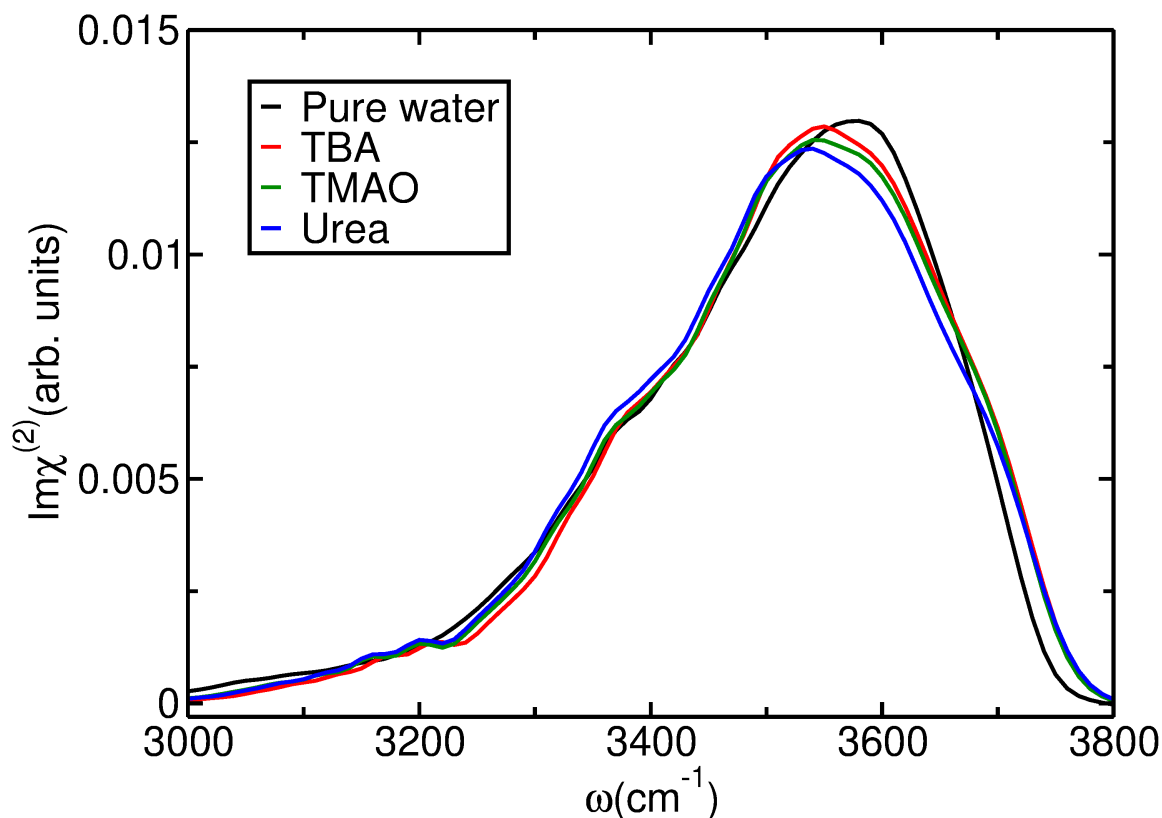

**Figure S3:** The VSFG spectrum calculated for water-surfactant system with the added salt  $\text{MgCl}_2$ . The spectral maps derived for pure water<sup>2</sup> (black), aqueous solutions of *tert*-butyl alcohol<sup>3</sup> (red), trimethylamine-N- oxide<sup>4</sup> (green), and urea<sup>4</sup> (blue) are used to calculate the VSFG spectrum.

## References

- [1] J. R. Lu, A. Marrocco, T. J. Su, R. K. Thomas and J. Penfold, *J. Colloid Interface Sci.*, 1993, **158**, 303-316
- [2] R. Malik, Abhilash Chandra, B. Das and A. Chandra, *J. Phys. Chem. B* 2023, **127**, 2488-2498.
- [3] R. Malik, B. Das and A. Chandra, *J. Phys. Chem. B* 2023, **127**, 4099-4111.
- [4] R. Malik and A. Chandra, *J. Phys. Chem. B* 2023, **127**, 7372-7383.
